# Supplementary material for: NLRP3 Inflammasome Simultaneously Involved in Autophagy and Phagocytosis of THP-1 Cells to Clear Aged Erythrocytes
Source: Hindawi journal article supplement (doi:10.1155/2022/1481154), 2022-09-30
Supplement: f1 [file 1481154.f1.pdf]

## Supplemental Data

### Supplemental Methods:

#### QRT-PCR primers and procedure for *NLRP3*

**Table 1 Primers for *NLRP3***

| Gene       | Primer  | Sequence (5'-3')      | PCR Products |
|------------|---------|-----------------------|--------------|
| Homo GAPDH | Forward | TCAAGAAGGTGGTGAAGCAGG | 115 bp       |
|            | Reverse | TCAAAGGTGGAGGAGTGGGT  |              |
| Homo NLRP3 | Forward | GTTTGACCCCGATGATGAGC  | 244 bp       |
|            | Reverse | CTTGTGGATGGGTGGGTTTG  |              |

**Table 2 QRT-PCR reaction system and procedure**

|                                 |             |
|---------------------------------|-------------|
| cDNA                            | 4 $\mu$ l   |
| Forward Primer (10 $\mu$ M)     | 0.4 $\mu$ l |
| Reverse Primer (10 $\mu$ M)     | 0.4 $\mu$ l |
| SYBR Green Master Mix           | 10 $\mu$ l  |
| 50 $\times$ ROX Reference Dye 2 | 0.4 $\mu$ l |
| H <sub>2</sub> O                | 4.8 $\mu$ l |

Procedure:

| Items               | Temperature | Time   | Cycles |
|---------------------|-------------|--------|--------|
| Pre-denaturation    | 95 °C       | 10 min | 1      |
| Denaturation        | 95 °C       | 15 sec | 40     |
| Annealing extension | 60 °C       | 60 sec |        |
| Melting curve       | 95 °C       | 15 sec | 1      |
|                     | 60 °C       | 60 sec |        |
|                     | 95 °C       | 15 sec |        |

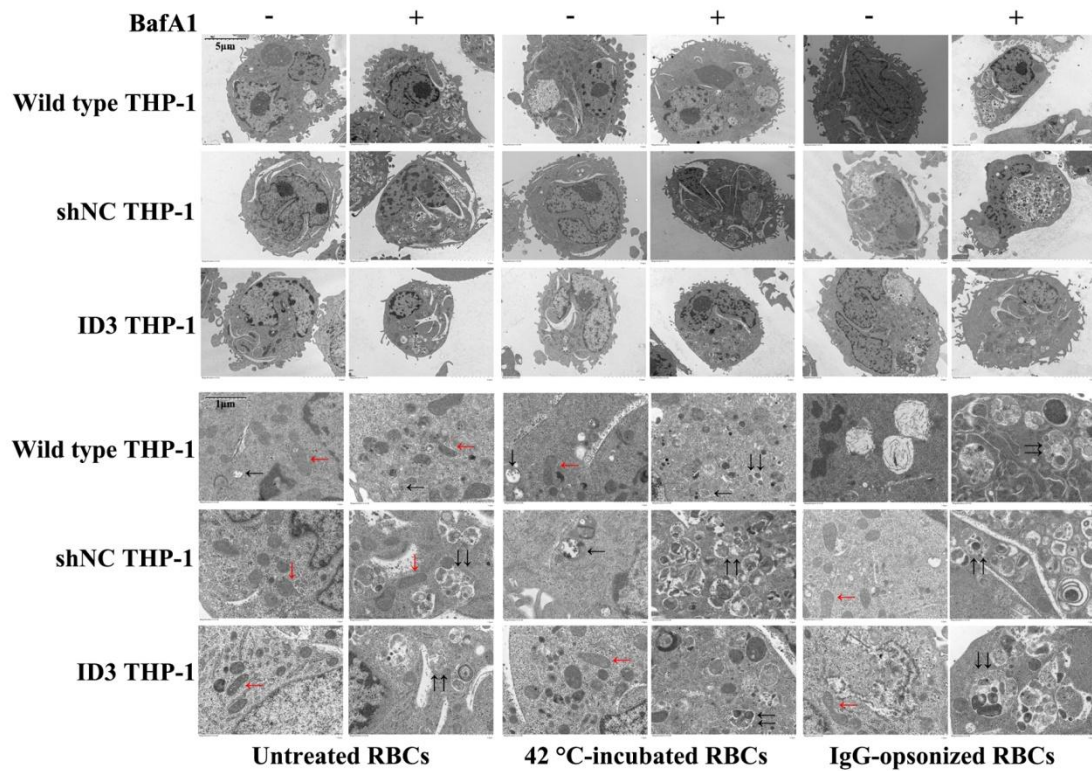

**Supplemental Figure 1. TEM images of the structure of autophagosomes and phagosomes.**

Arrows indicate autophagosomes, double arrows indicate phagosomes, and red arrows indicate mitochondria. The above column show the imaging results of TEM (3,000 $\times$ , scale=5  $\mu$ m), whereas the below column depict the TEM results (12,000 $\times$ , scale=1  $\mu$ m). The three THP-1 cells (wild-type, shNC, and ID3 THP-1) all show additional autophagosomes under starvation and rapamycin stimulation. The number of autophagosomes in THP-1 cells decrease and the number of phagosomes increase when THP-1 cells engulf RBCs, especially 42 °C-incubated and IgG-opsonized RBCs. Phagosomes in THP-1 cells are significantly upregulated while the number of autophagosomes significantly decrease in BafA1 preinduced groups after phagocytosis of RBCs is treated using the same method. The number of autophagosomes and phagosomes in ID3 THP-1 cells with low expression of NLRP3 inflammasome is less than that in wild-type and shNC THP-1 cells after receiving the same stimulation.
